# Supplementary material for: 3D nanoflower-like and core–shell structured MCo2O4@MCo2S4@polypyrrole (M = Cu, Mn) composites as supercapacitor electrode materials with ultrahigh specific capacitances
Source: Royal Society of Chemistry journal article supplement (doi:10.1039/d2ta09578e), 2023-01-01
Supplement: d2ta09578e1.pdf [file d2ta09578e1.pdf]

**3D Nanoflower-liked and Core-Shell Structured  $\text{MCo}_2\text{O}_4@ \text{MCo}_2\text{S}_4@ \text{Polypyrrole}$  (M = Cu, Mn) Composites as Supercapacitors Electrode Materials with Ultrahigh Specific Capacitances**

Chunxiao Wang <sup>a</sup>, Yuesheng Sun <sup>a</sup>, Yawen Liu <sup>a</sup>, Liang Cui <sup>b,\*</sup>, Jingquan Liu <sup>a,b,\*</sup>

<sup>a</sup> College of Materials Science and Engineering, Institute for Graphene Applied Technology Innovation, Qingdao University, Qingdao, 266071, China.

<sup>b</sup> College of Materials Science and Engineering, Linyi University, Linyi, 276000 Shandong, China

\*Corresponding authors.

Tel: +86 532 83780128.

E-mail address: cuiliang@lyu.edu.cn (Liang Cui), E-mail: jliu@qdu.edu.cn (Jingquan Liu)

**KEYWORDS:**  $\text{MCo}_2\text{O}_4@ \text{MCo}_2\text{S}_4@ \text{Polypyrrole}$  (M=Cu, Mn); 3D Self-supported electrode; Nanoflower structure; Core-Shell structure; Ultrahigh Specific Capacitance; Supercapacitors

In addition, the specific capacitances of the as-prepared samples were calculated by Equation S1:

$$C_A = \frac{I \int V \Delta t}{sV^2} \quad (\text{S1})$$

**Table S1** The  $C_s$  values of all as-prepared samples at 1 A g<sup>-1</sup>.

| Materials         | Current density (A g <sup>-1</sup> ) | $C_s$ (F g <sup>-1</sup> ) |
|-------------------|--------------------------------------|----------------------------|
| CuC/NF            | 1                                    | 1098.7                     |
| CuC@CuS/NF        | 1                                    | 1513.88                    |
| CuC@CuS@PPy-8/NF  | 1                                    | 1750.44                    |
| CuC@CuS@PPy-16/NF | 1                                    | 2978.1                     |
| CuC@CuS@PPy-24/NF | 1                                    | 2479.3                     |
| MnC/NF            | 1                                    | 1145.4                     |
| MnC@MnS/NF        | 1                                    | 3186.8                     |
| MnC@MnS@PPy-8/NF  | 1                                    | 4278.2                     |
| MnC@MnS@PPy-16/NF | 1                                    | 4713.4                     |
| MnC@MnS@PPy-24/NF | 1                                    | 4003.5                     |

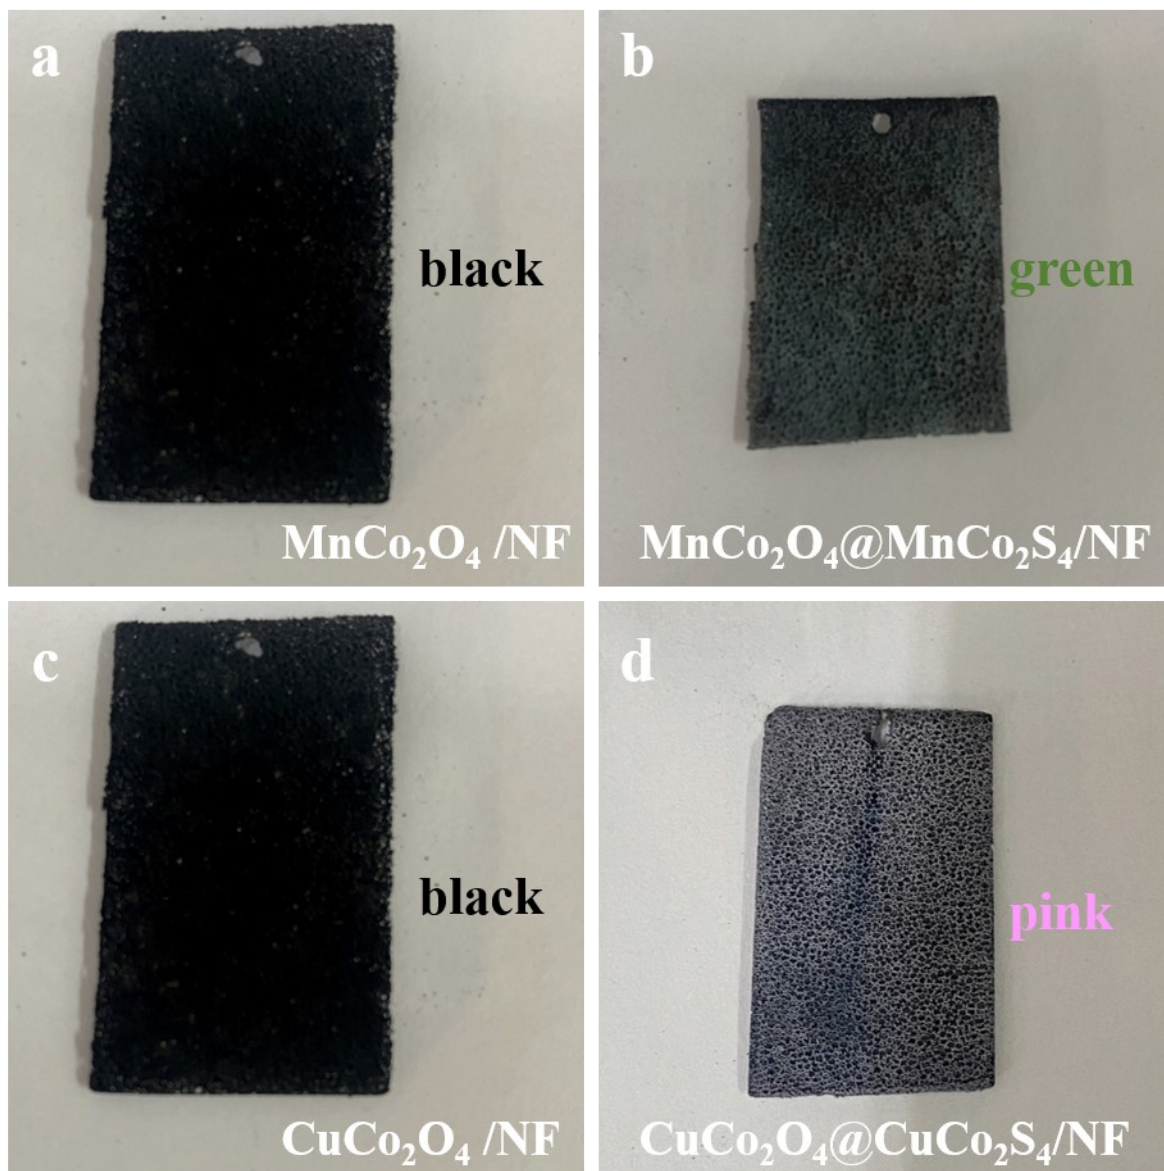

**Figure S1** Optical photographs of (a) MnCo<sub>2</sub>O<sub>4</sub>/NF and (c) CuCo<sub>2</sub>O<sub>4</sub>/NF (the black one), (b) MnCo<sub>2</sub>O<sub>4</sub>@MnCo<sub>2</sub>S<sub>4</sub>/NF (the green one) and (d) CuCo<sub>2</sub>O<sub>4</sub>@CuCo<sub>2</sub>S<sub>4</sub>/NF (the pink one).

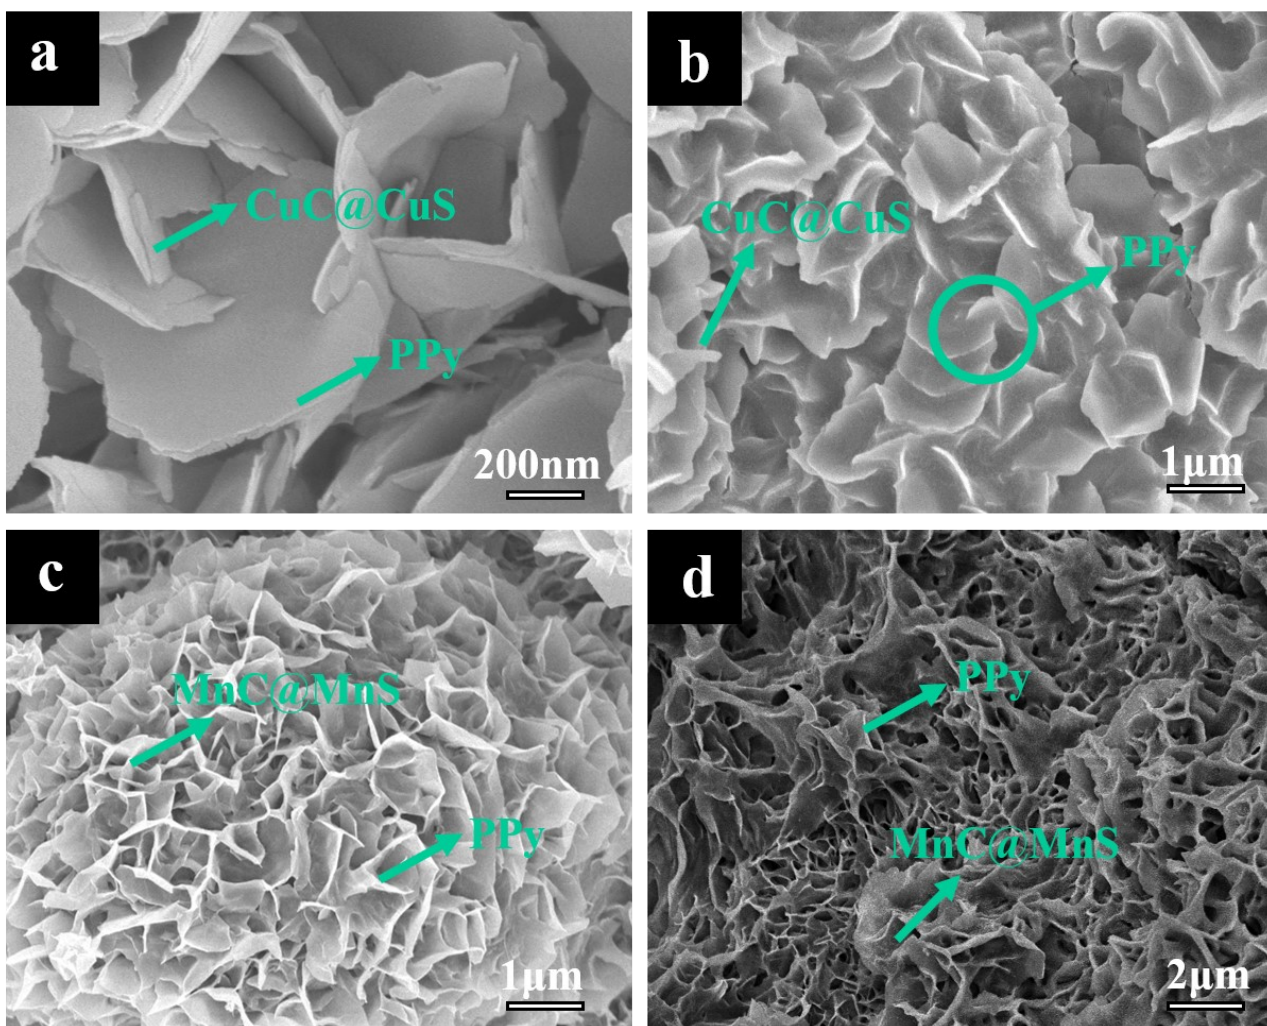

**Figure S2** SEM images of (a) CuC@CuS@PPy-8, (b) CuC@CuS@PPy-24, (c) MnC@MnS@PPy-8 and (d) MnC@MnS@PPy-24 at different magnifications.

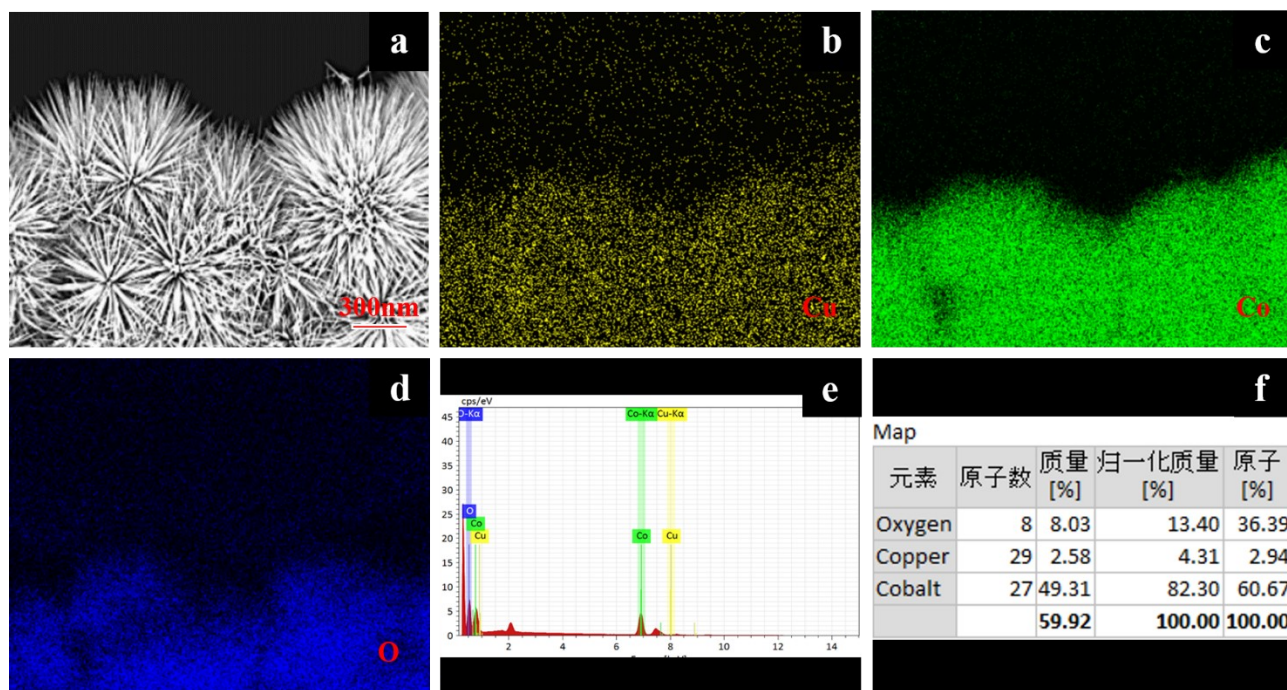

**Figure S3** EDS mapping patterns (a-d) and EDS quantitative analysis spectra (e, f) of  $\text{CuCo}_2\text{O}_4/\text{NF}$ .

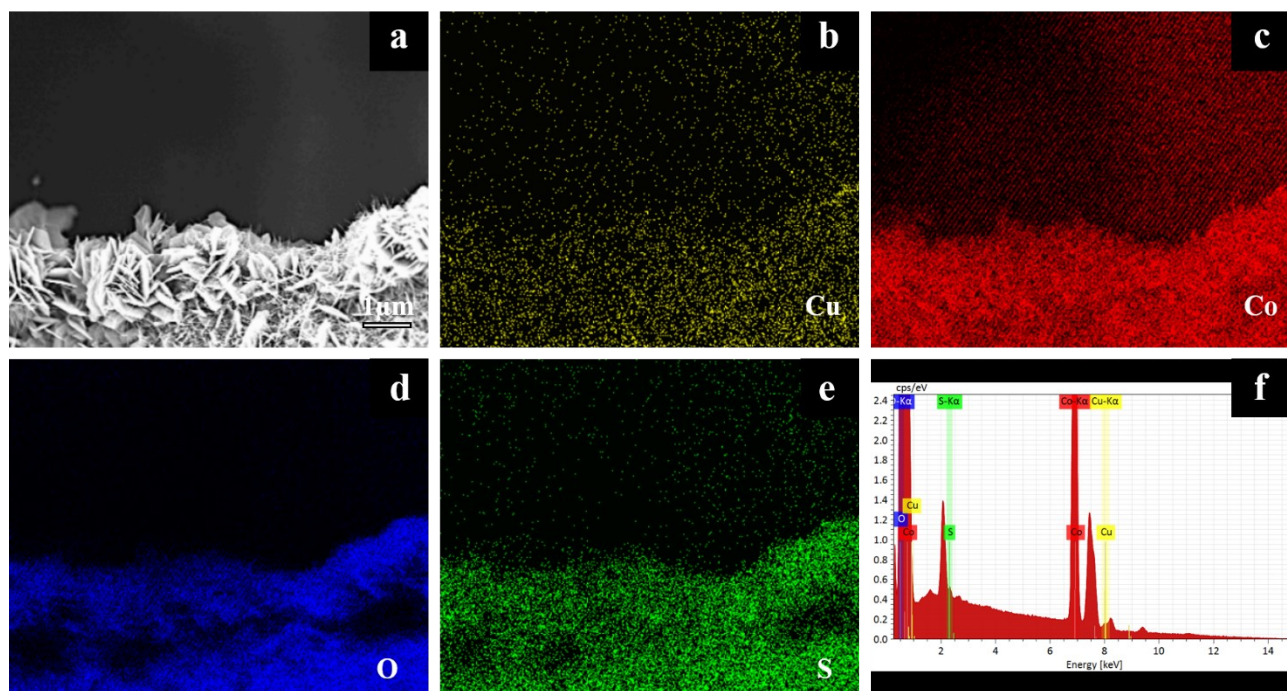

**Figure S4** EDS mapping patterns (a-e) and EDS quantitative analysis spectra (f) of  $\text{CuCo}_2\text{O}_4@\text{CuCo}_2\text{S}_4/\text{NF}$ .

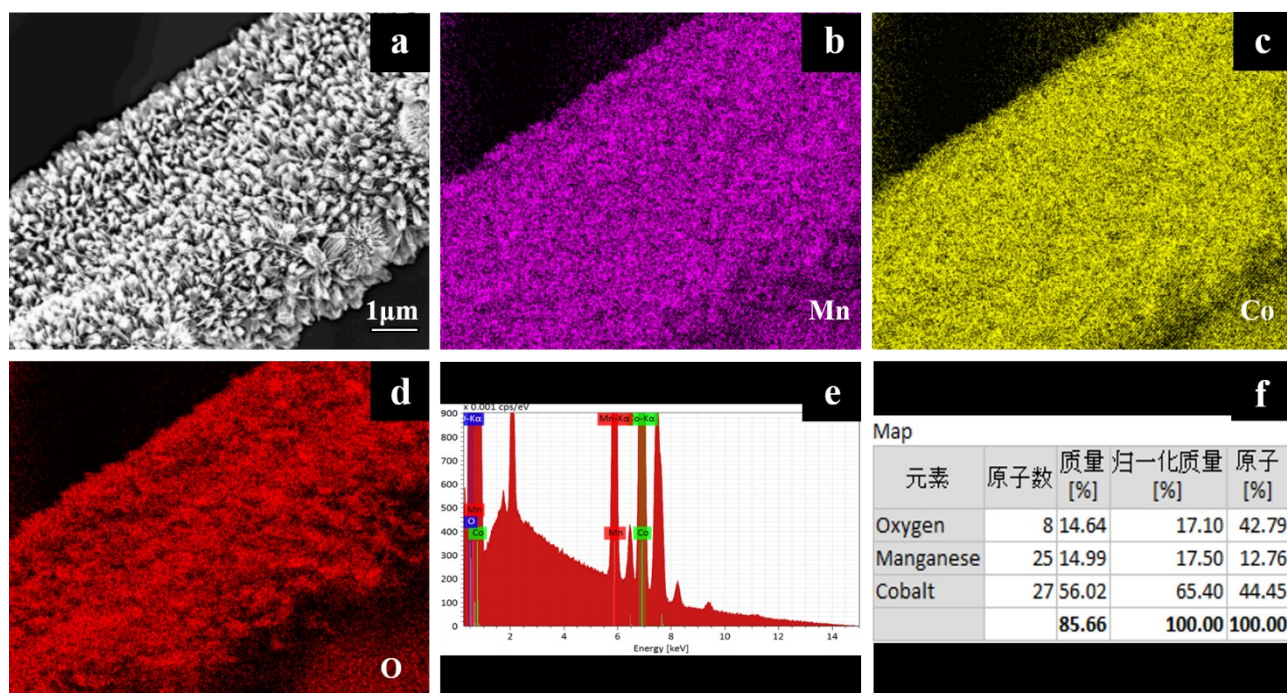

**Figure S5** EDS mapping patterns (a-d) and EDS quantitative analysis spectra (e, f) of  $\text{MnCo}_2\text{O}_4/\text{NF}$ .

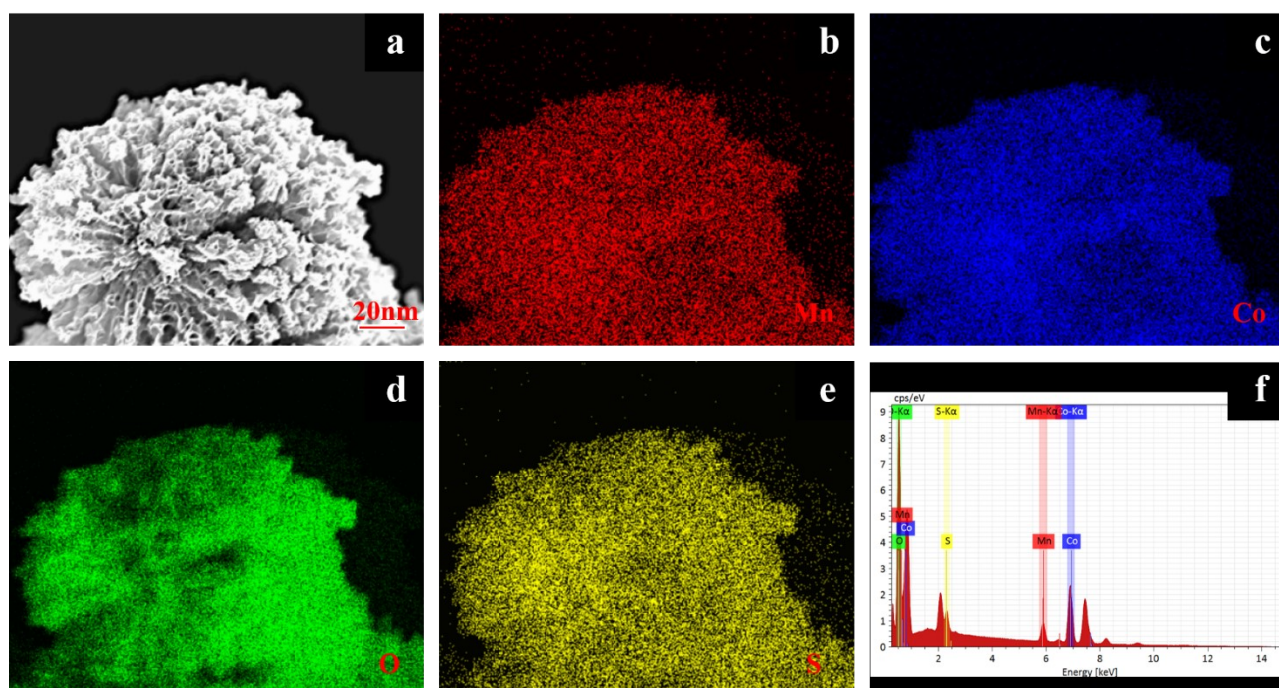

**Figure S6** EDS mapping patterns (a-e) and EDS quantitative analysis spectra (e) of  $\text{MnCo}_2\text{O}_4@\text{MnCo}_2\text{S}_4/\text{NF}$ .

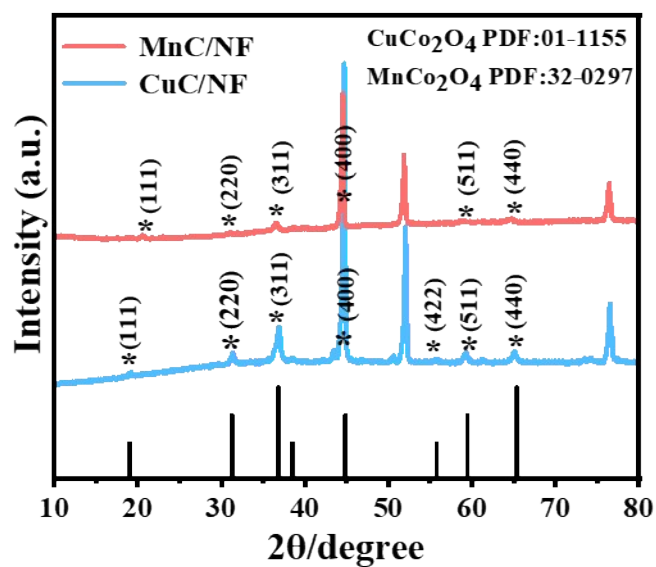

Figure S7 The XRD patterns of MnC/NF and CuC/NF.

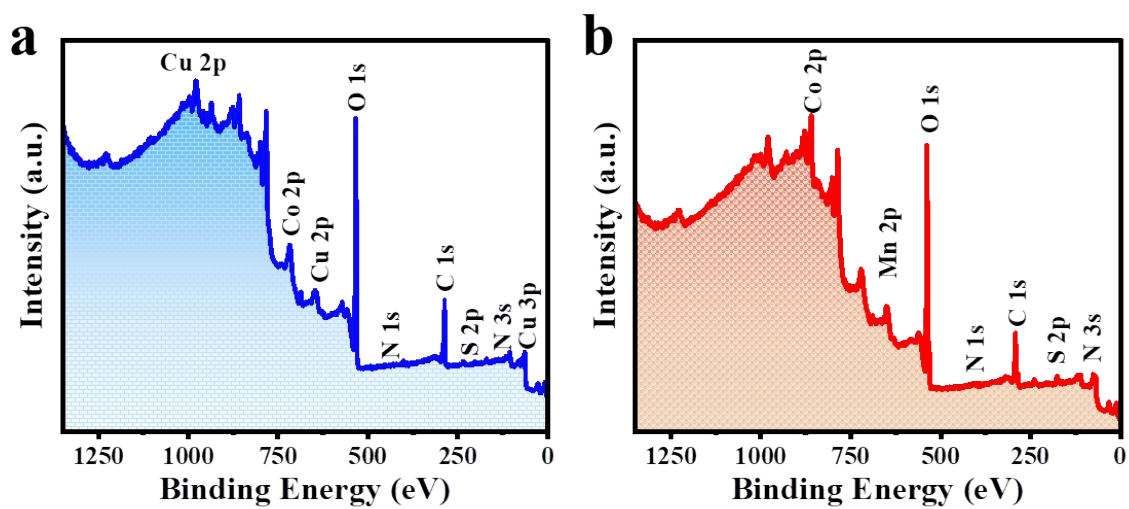

Figure S8 XPS survey spectrums of (a)  $\text{CuCo}_2\text{O}_4@\text{CuCo}_2\text{S}_4@\text{PPy-16/NF}$  and (b)  $\text{MnCo}_2\text{O}_4@\text{MnCo}_2\text{S}_4@\text{PPy-16/NF}$ .

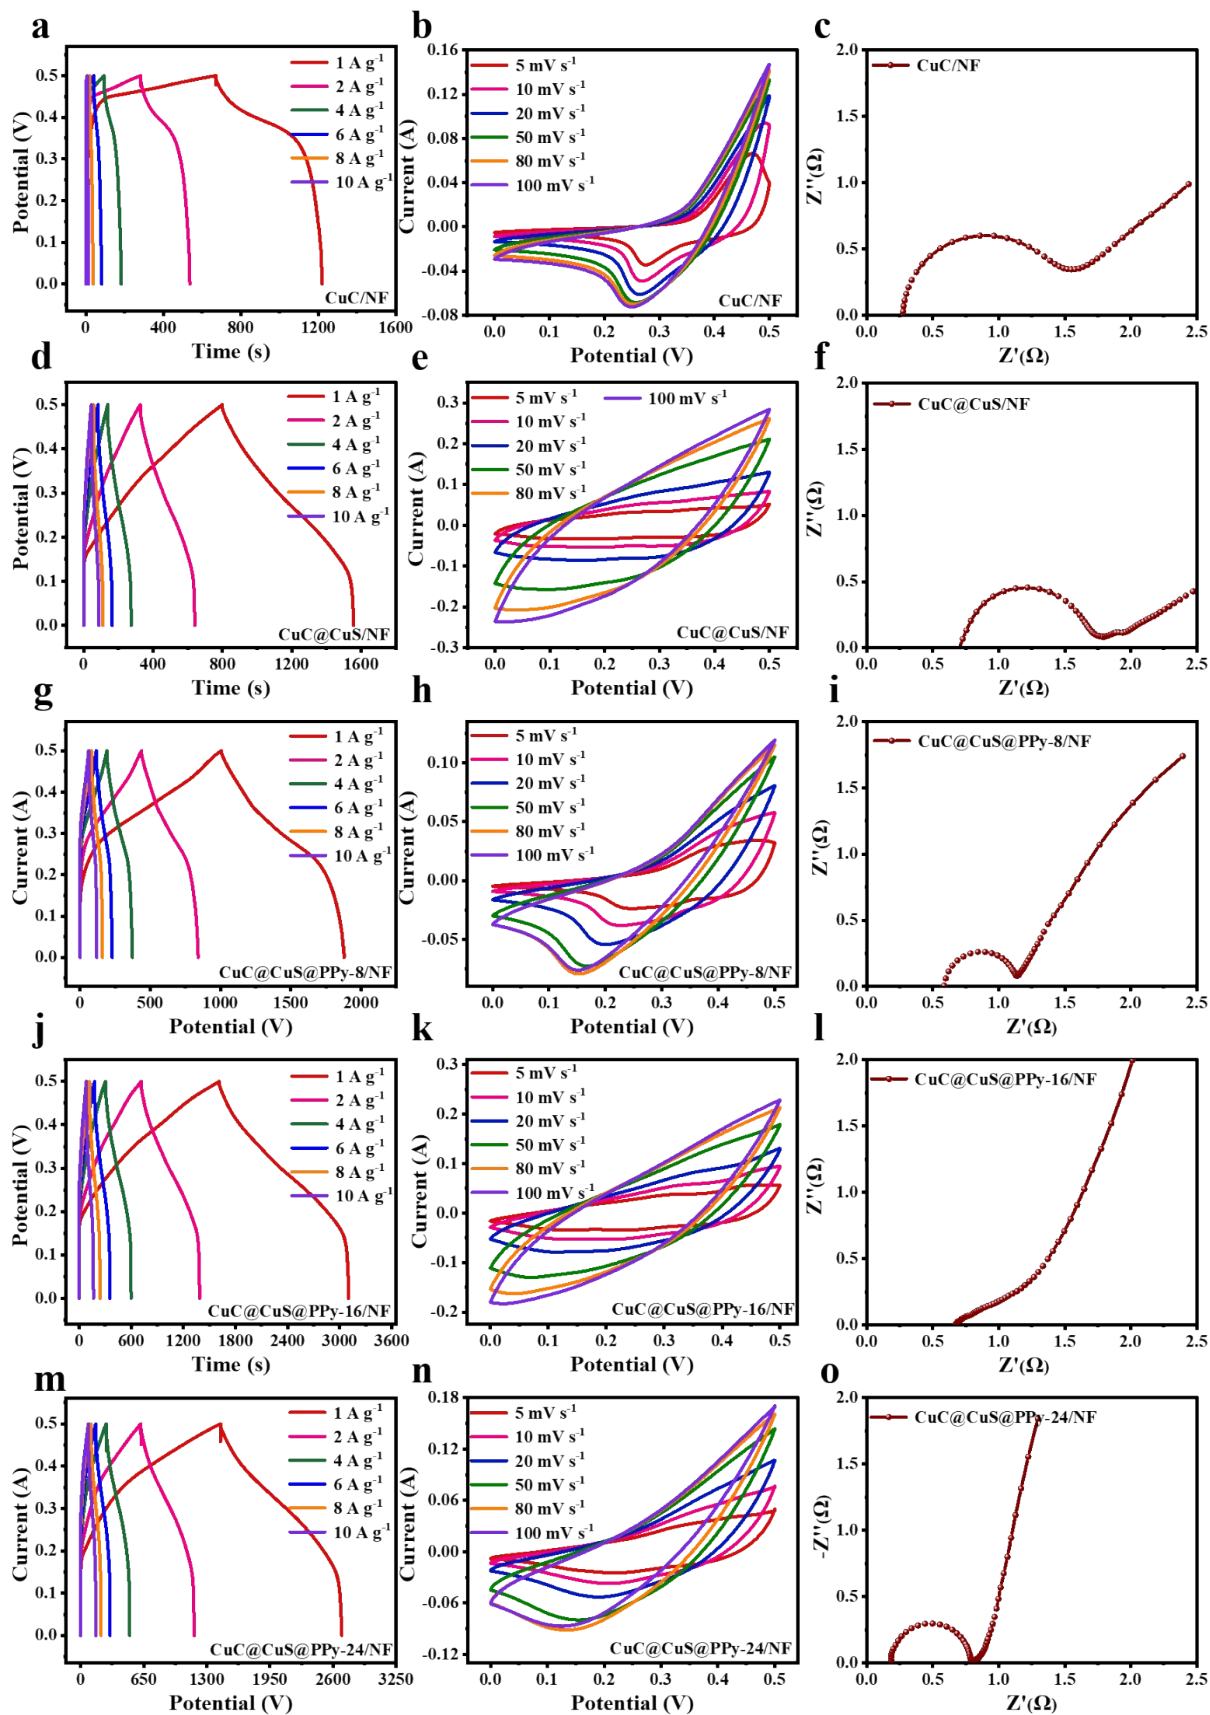



**Figure S9** (a), (d), (g), (j) and (m) GCD curves of as-prepared samples at various current densities. (b), (e), (h), (k) and (n) CV curves of as-prepared samples at different scan rates. (c), (f), (i), (l) and (o) Nyquist plots of as-prepared samples.

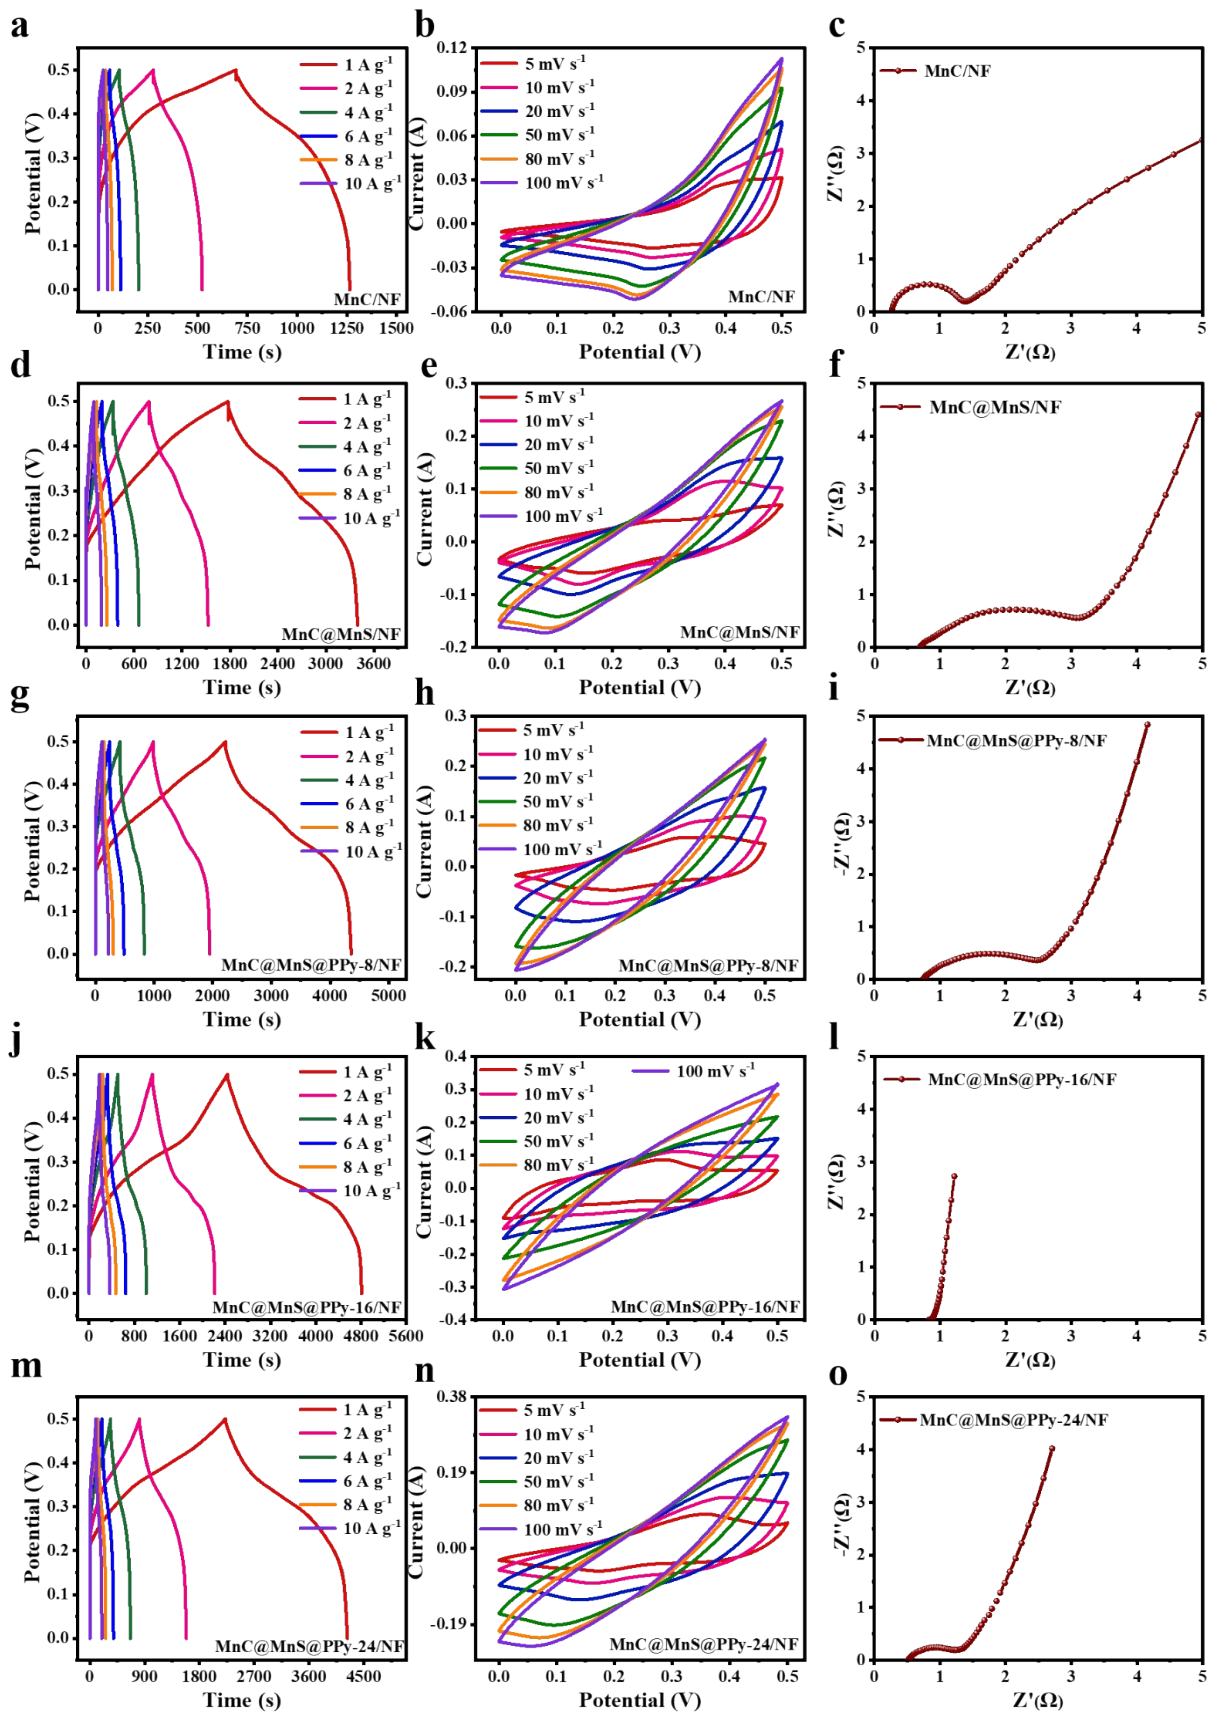

**Figure S10** (a), (d), (g), (j) and (m) GCD curves of as-prepared samples at various current densities. (b), (e), (h), (k) and (n) CV curves of as-prepared samples at different scan rates. (c), (f), (i), (l) and (o) Nyquist plots of as-prepared samples.

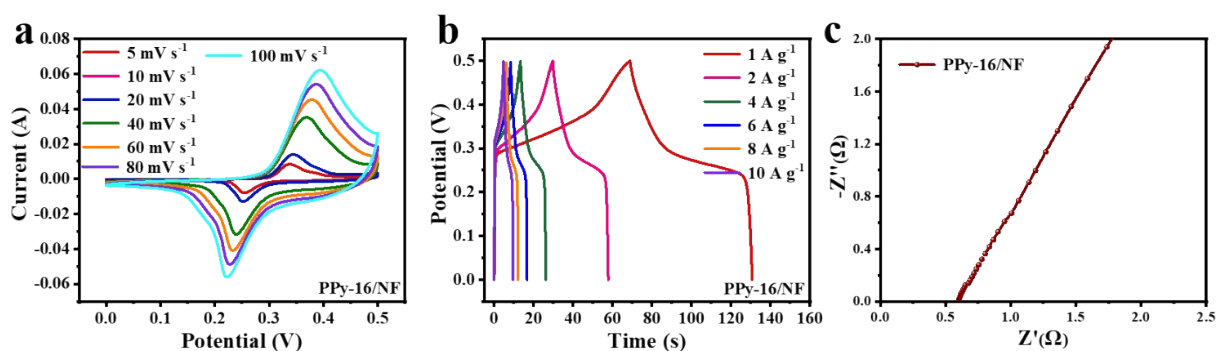

**Figure S11** CV curves (a) of PPy-16/NF electrode at different scanning speeds under the potential windows of 0-0.5 V, GCD curves (b) of PPy-16/NF electrode at various current densities within 0-0.5 V and Nyquist plots (c) of PPy-16/NF electrode.

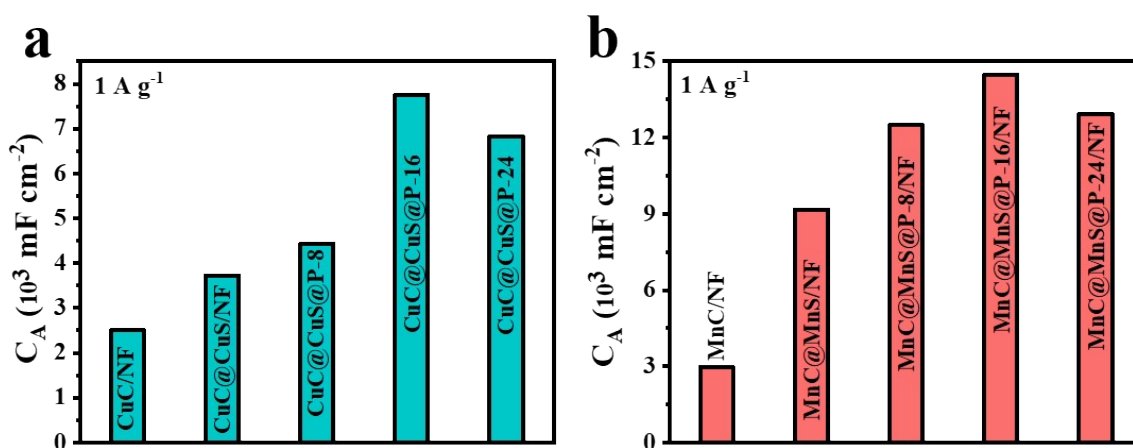

**Figure S12** Areal capacitance curves of all prepared electrode materials at a low current density of  $1 \text{ A g}^{-1}$ .

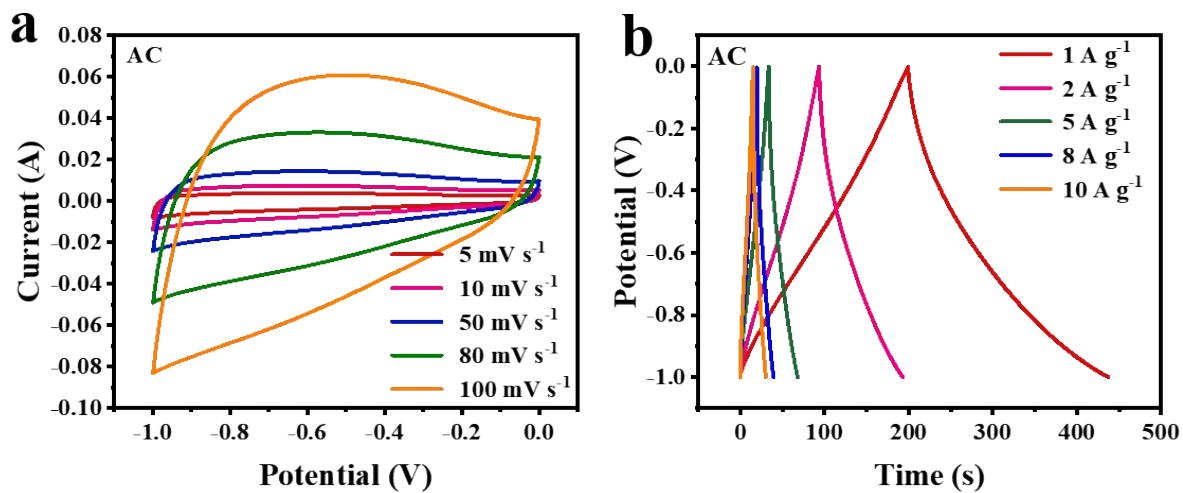

**Figure S13** CV curves (a) of AC electrode at different scanning speeds under the potential windows of -1.0-0 V and GCD curves (b) of AC electrode at various current densities within -1.0-0 V.

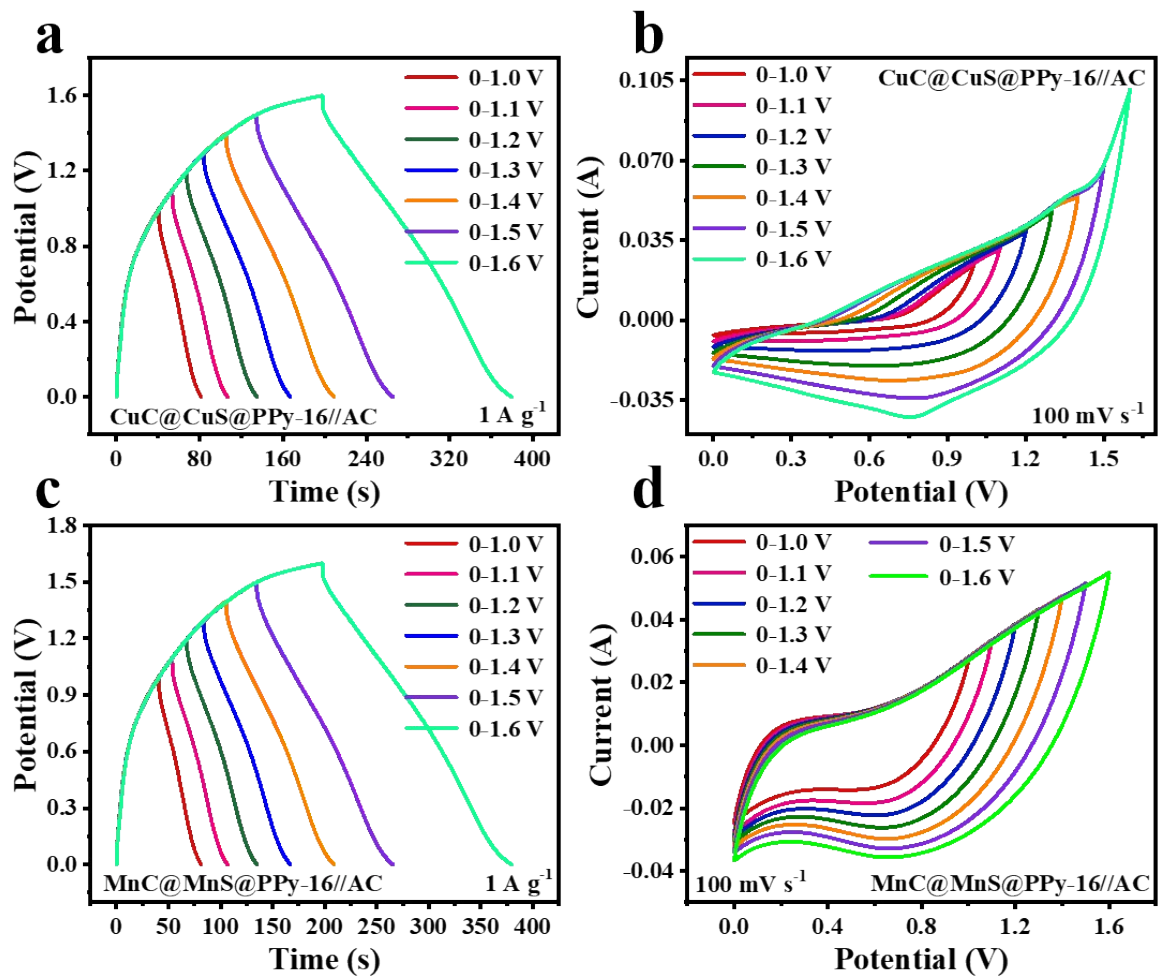

**Figure S14** CV curves (a, c) and GCD curves (b, d) of MC@MS@PPy-16/NF//AC ASCs device (M=Cu, Mn) at different potential windows from 0-1.0 V to 0-1.6V.

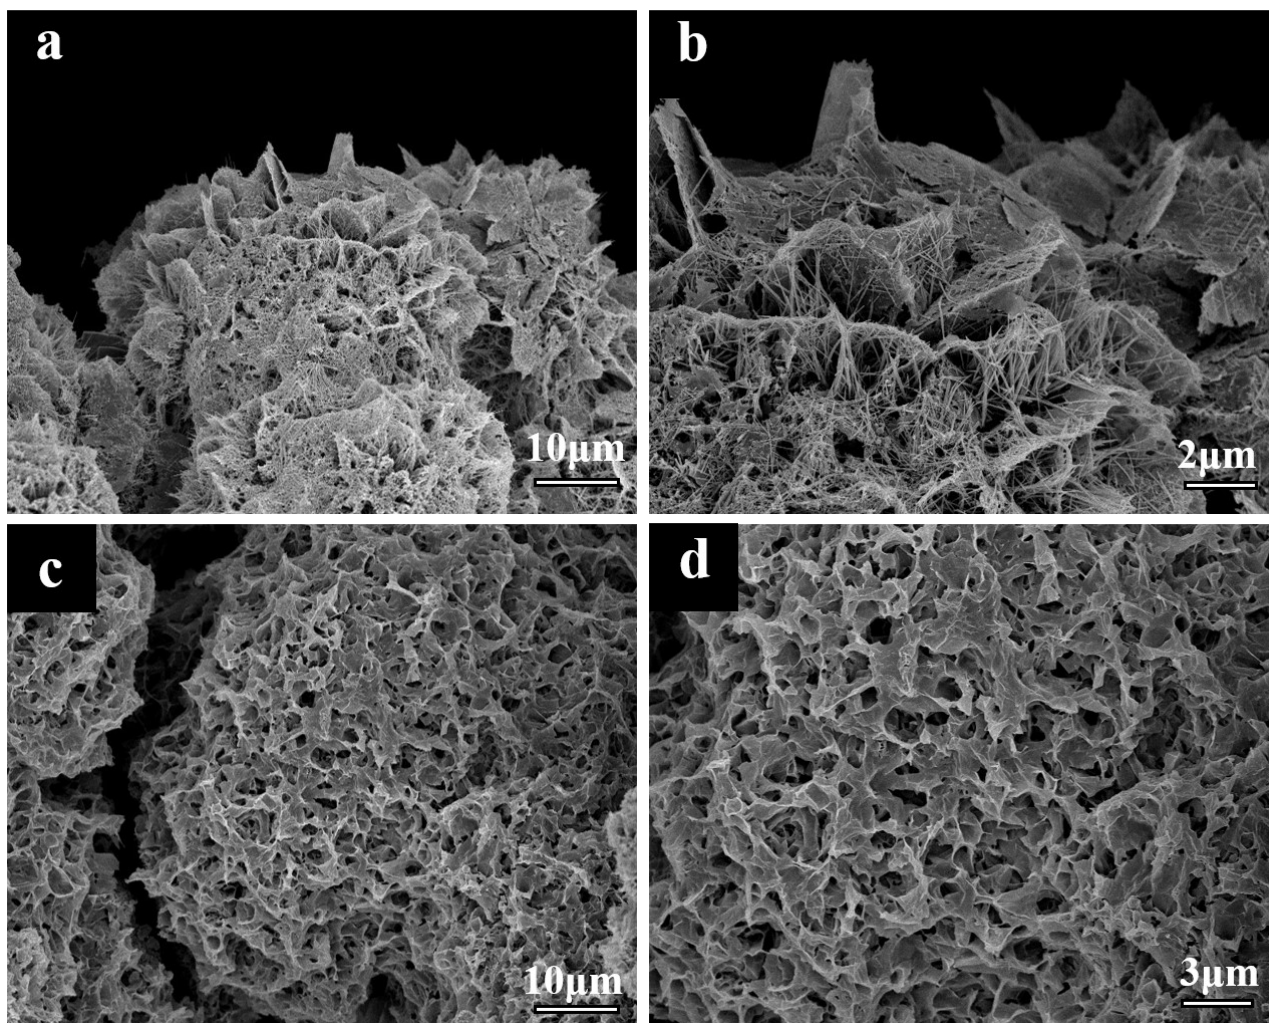

**Figure S15** (a, b) SEM images of CuC@CuS@PPy-16/NF electrode and (c, d) MnC@MnS@PPy-16/NF electrode at different magnifications after 10000 GCD cycles.
